# Supplementary material for: Comprehensive analysis of PD-L1 expression, tumor-infiltrating lymphocytes, and tumor microenvironment in LUAD: differences between Asians and Caucasians
Source: PubMed Central journal article supplement (PMC8693498; doi:10.1186/s13148-021-01221-3), 2021-12-21

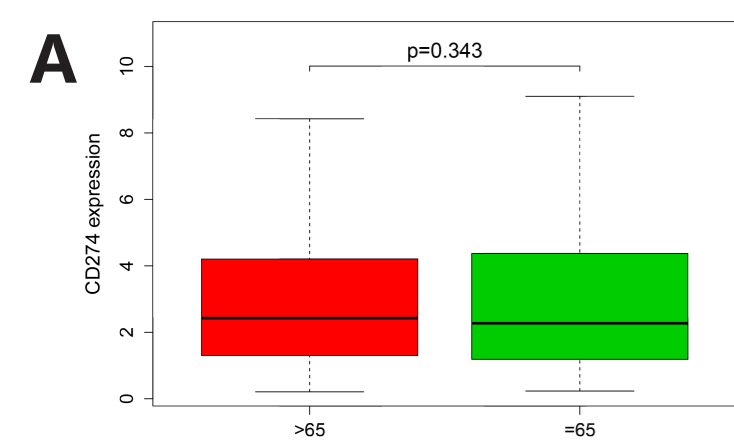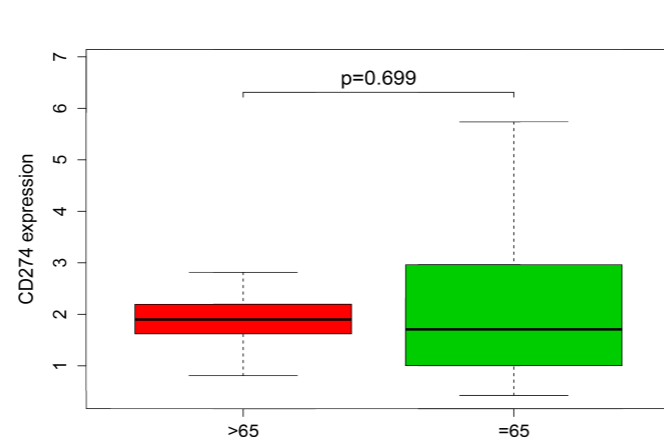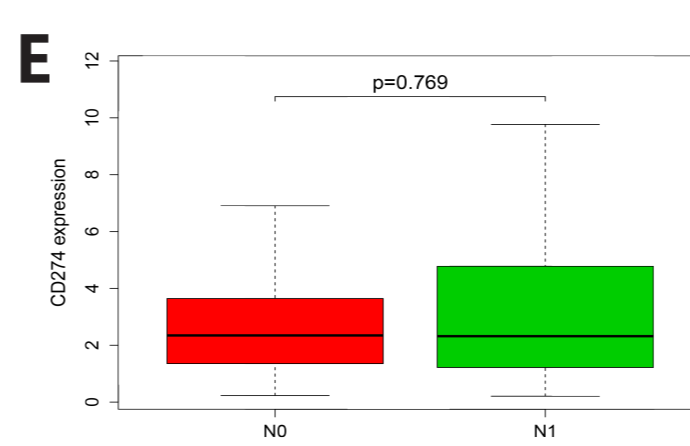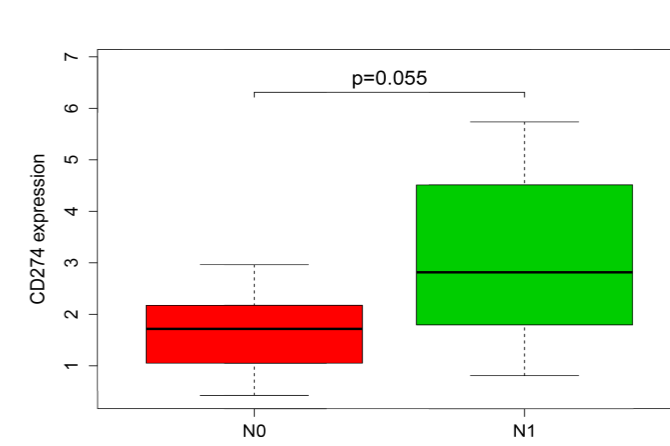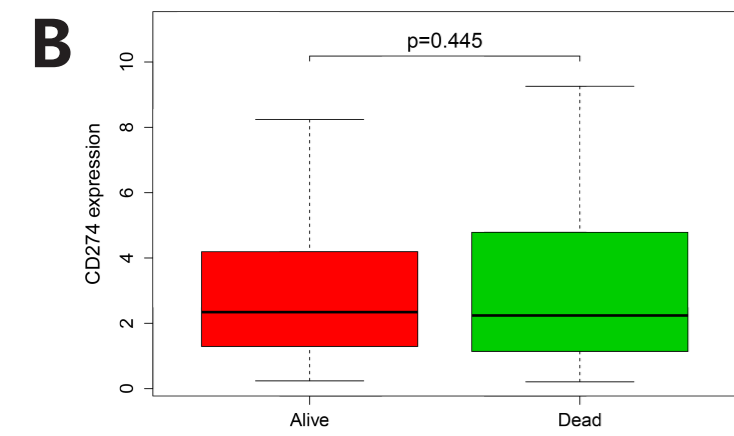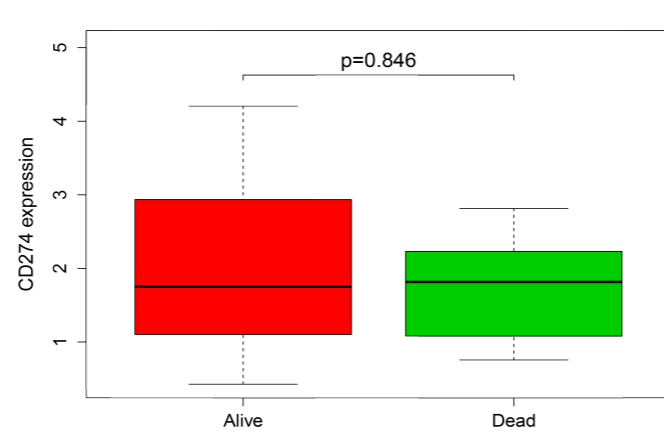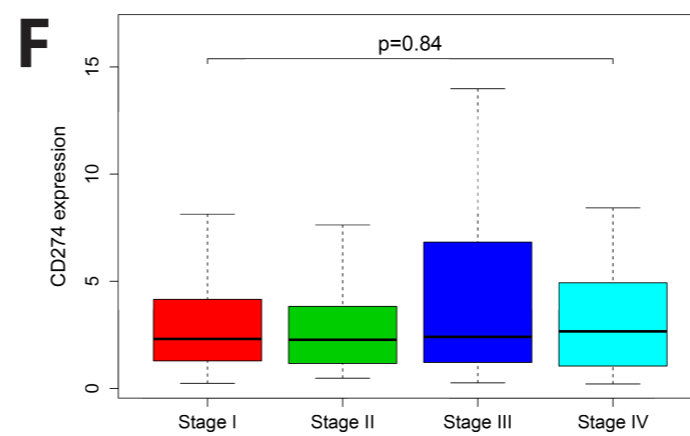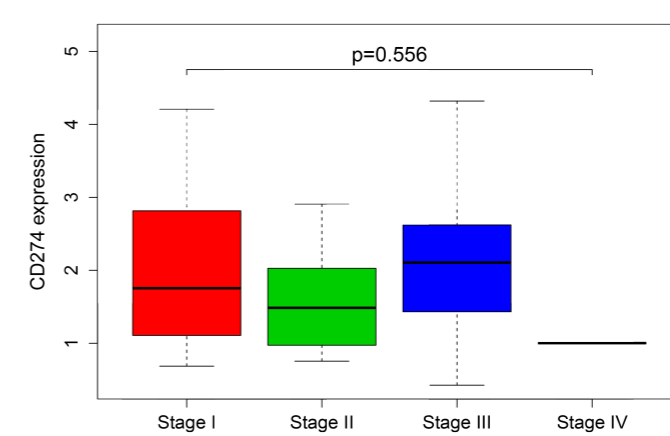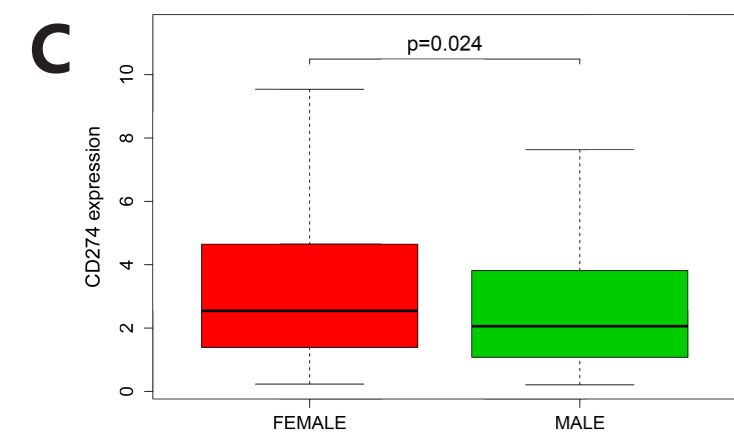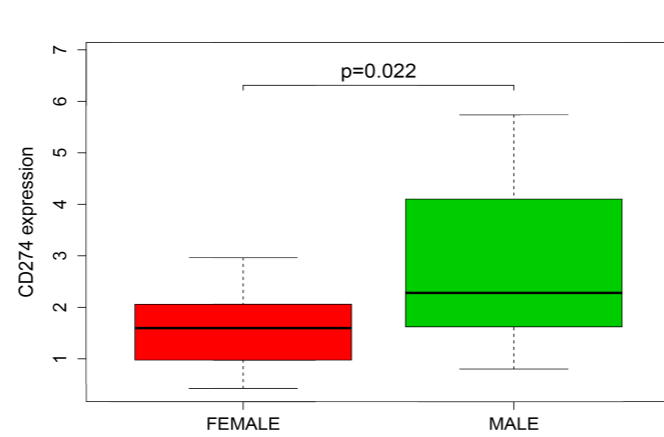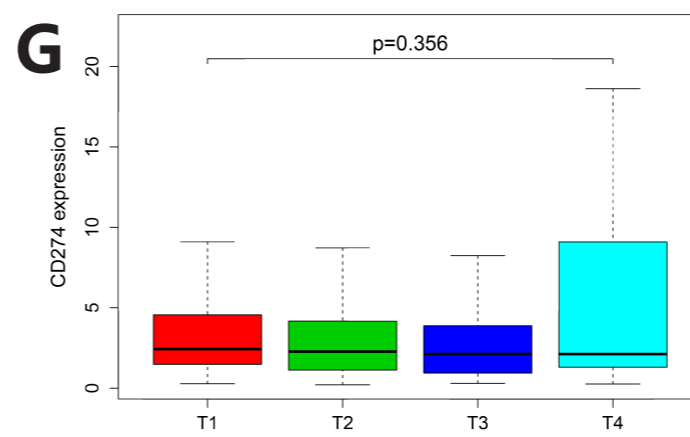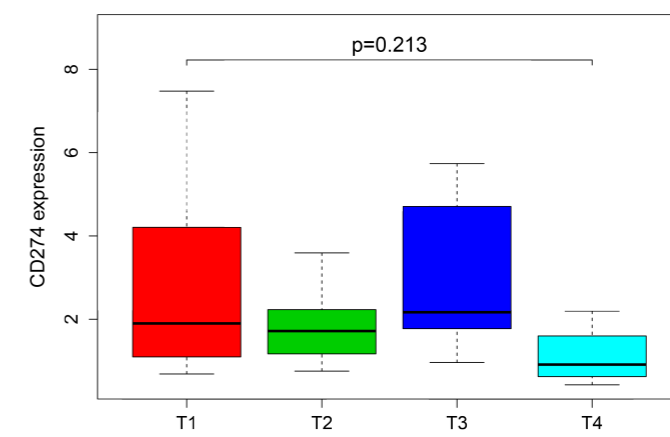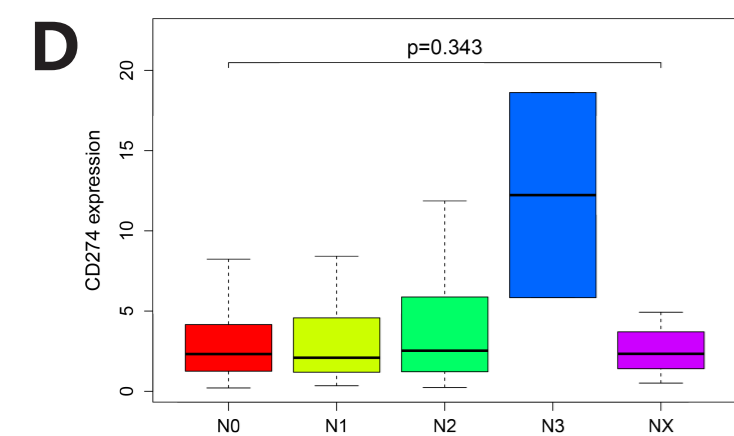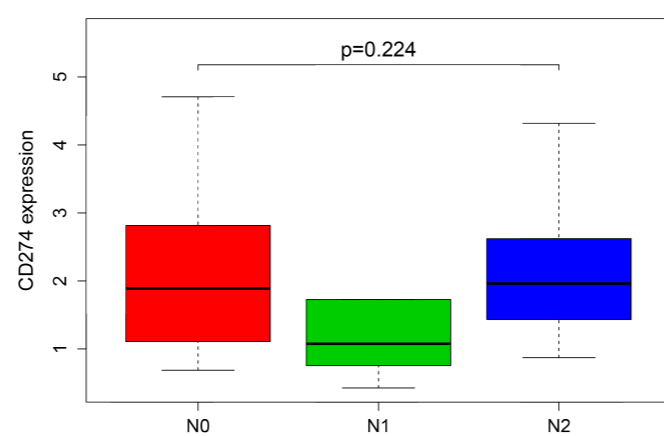

Supplement: 13148_2021_1221_MOESM2_ESM.pdf [file 13148_2021_1221_MOESM2_ESM.pdf]
